# Supplementary material
Source: PubMed Central journal article supplement (PMC6708348)
Supplement: pnas.1821204116.sapp.pdf [file pnas.1821204116.sapp.pdf]

1

## 2 **Supplementary Information for**

### 3 **Risk of being killed by police use-of-force in the U.S. by age, race/ethnicity, and sex**

4 **Frank Edwards, Hedwig Lee, and Michael Esposito**

5 **Frank Edwards.**

6 **E-mail: [frank.edwards@rutgers.edu](mailto:frank.edwards@rutgers.edu)**

#### 7 **This PDF file includes:**

8     Supplementary text

9     Figs. S1 to S12

10    Tables S1 to S3

11    References for SI reference citations

## 12 Supporting Information Text

### 13 Introduction: Rare events and unofficial data

14 The analyses in this paper seek to simultaneously address two significant methodological challenges. The first is the relative  
15 rarity of police-involved killings for many age-sex-race specific subgroups with small national populations. The second is the  
16 absence of valid official data.

17 First, Police killings are a relatively rare event for many race-age-sex specific subgroups. For example, we estimate that  
18 Asian/Pacific Islander women between the ages of 50 and 54 are killed by police at a rate of about 0.04 per 100000 person-years.  
19 In 2017, the American Community Survey reports a population of Asian/Pacific-Islander women between the ages of 50 and 54  
20 of 666102. At our estimated rate of police use-of-force killings, we expect to observe an average of about 0.3 deaths per year in  
21 this age group. Between 2013 and 2017, we observe only one death in this age-race-sex group. Relying on any single year for  
22 life table estimates would produce a misleading estimate for age-specific risk, with a single-year estimated rate varying between  
23 zero and 0.15 per 100000 depending on the presence or absence of a death in that year. By including multiple years of valid  
24 data and using statistical models, we are able to incorporate dramatically more information to estimate risk. However, by  
25 doing so, we assume that differences in risk across groups over time remain relatively stable. Temporal trends can be directly  
26 modeled as a source of uncertainty. We rely on multilevel models and Bayesian simulation to directly incorporate multiple  
27 sources of uncertainty to more accurately estimate mortality risk. We describe these methods in more detail below.

28 Second, there are currently no nationally comprehensive official sources of data on police-involved killings. The Bureau of  
29 Justice Statistics acknowledged the limitations of their Arrest-Related Deaths data collection effort, and ceased data collection  
30 in 2014 (1). The National Vital Statistics System (NVSS), the nation's key source of mortality data is known to undercount  
31 law enforcement related deaths (2). The National Violent Death Reporting System (NVDRS) has far better coverage of  
32 police-involved deaths than does NVSS (3), but currently lacks the geographic and temporal coverage needed to generate  
33 national risk estimates. Despite calls for better data on police-involved deaths (4), government agencies have systematically  
34 failed to design and implement such a system to track officer-involved killings, or more generally, officer use-of-force. Journalists  
35 and independent researchers have stepped into this gap. Following the rise of the Black Lives Matter movement and increasing  
36 attention paid to police killings of people of color in the mid 2010s, multiple projects emerged to use public records and media  
37 reports to systematically document police violence. However, these unofficial data have important limitations. We describe  
38 these limitations and assess the validity of the data relative to the partial data available from the NVSS below.

### 39 Assessing the validity of unofficial data on police-involved deaths

40 Among these novel data collection efforts, Fatal Encounters has the broadest temporal scope and inclusion criteria for police-  
41 involved deaths. Where other efforts have focused exclusively on shootings or a narrow subset of years, Fatal Encounters  
42 seeks to include all cases in which police were in any way involved in a death of a civilian between January 1, 2000 and the  
43 present, with the exception of deaths occurring in custody (that is after an arrestee has been formally booked into a jail or  
44 other detention facility). Below, we consider the validity of counts derived from Fatal Encounters over time, and evaluate the  
45 validity of individual variables in FE. To do so, we largely rely on comparisons to deaths recorded as police-involved in the  
46 NVSS. While NVSS is known to significantly undercount these cases (2), it provides some information about trends over time  
47 and the racial composition of deaths that we can use to inspect any serious deviations from the patterns we observe in Fatal  
48 Encounters.

49 **Comparing trends in NVSS and Fatal Encounters.** The National Vital Statistics System provides a potential source for evaluating  
50 the external validity of Fatal Encounters data. “Legal intervention” is included among the ICD-10 codes for causes of death  
51 in NVSS. Prior research has established that NVSS systematically undercounts officer-involved deaths (2). However, if we  
52 assume that there has been no change in the probability that officer-involved deaths are coded as “legal intervention” in  
53 NVSS over time, the observable time series trends in NVSS should be correlated with the true unobserved time series of  
54 police-involved deaths. With this assumption, we evaluate the time series of NVSS police-involved deaths and Fatal Encounters  
55 officer use-of-force deaths to explore whether FE consistently tracks the NVSS trend over time and gain insight into temporal  
56 trends in the risk of police-involved death. We display this time series in Figure S1. Because NVSS counts are significantly  
57 lower than FE counts, we provide a time series transformed to a proportional change in counts of deaths relative to the count  
58 of deaths in 2000 in each dataset in Figure S2 to enable direct comparison of the two trends on a common scale.

59 Figures S1 and S2 show that counts of deaths reported in NVSS remained relatively stable between 2000 and 2010. During  
60 this time, rates fluctuated between 1.0 and 1.2 times the count of officer-involved deaths reported in 2000. Between 2011 and  
61 2017 (the most recent available data), the count of cases in the data increased substantially. In 2017, there were about 1.7  
62 times more legal intervention deaths reported in NVSS than there were in 2000.

63 Fatal Encounters exhibits a relatively stable positive trend between 2000 and 2018. The magnitude of growth in cases  
64 recorded in FE over time is higher than for NVSS; for 2018, FE records about 2.3 times more deaths than it records for 2000.  
65 While this evidence is far from definitive, trends in the proliferation of internet access and the NVSS time series suggest that  
66 undercounts in Fatal Encounters due to unavailable online news records of officer-involved deaths likely decreased over time  
67 until approximately 2007. The shape of trends in Fatal Encounters and NVSS become more tightly linked between 2008 and  
68 2017.

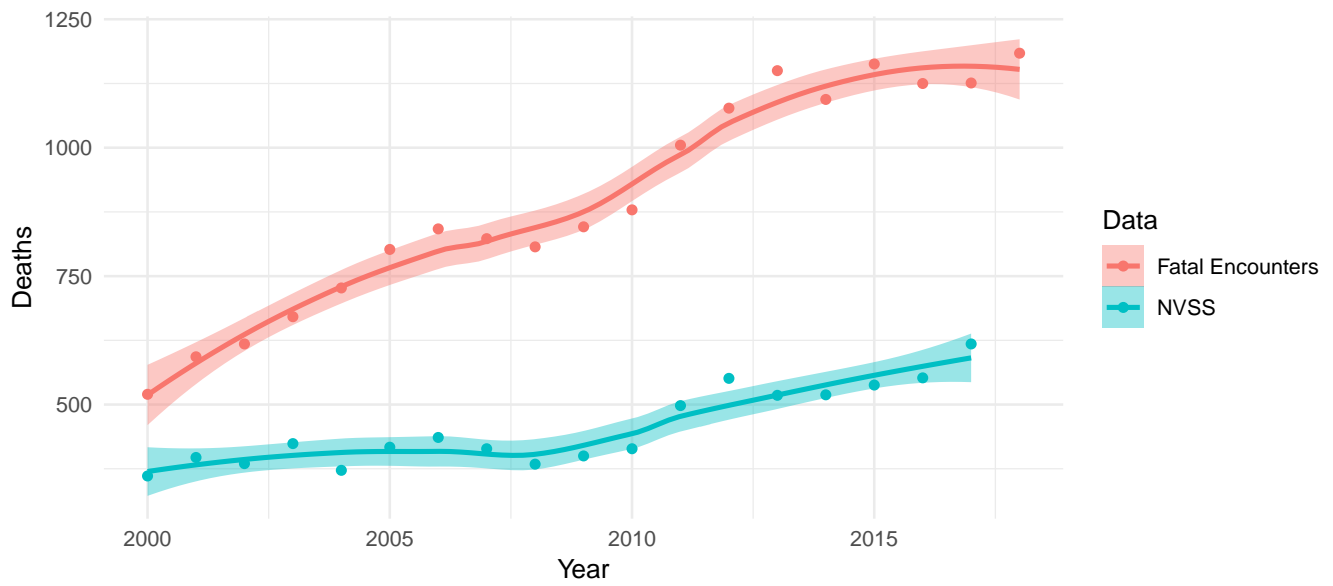

**Fig. S1.** Deaths due to officer use of force recorded in Fatal Encounters and NVSS 2000 to 2018

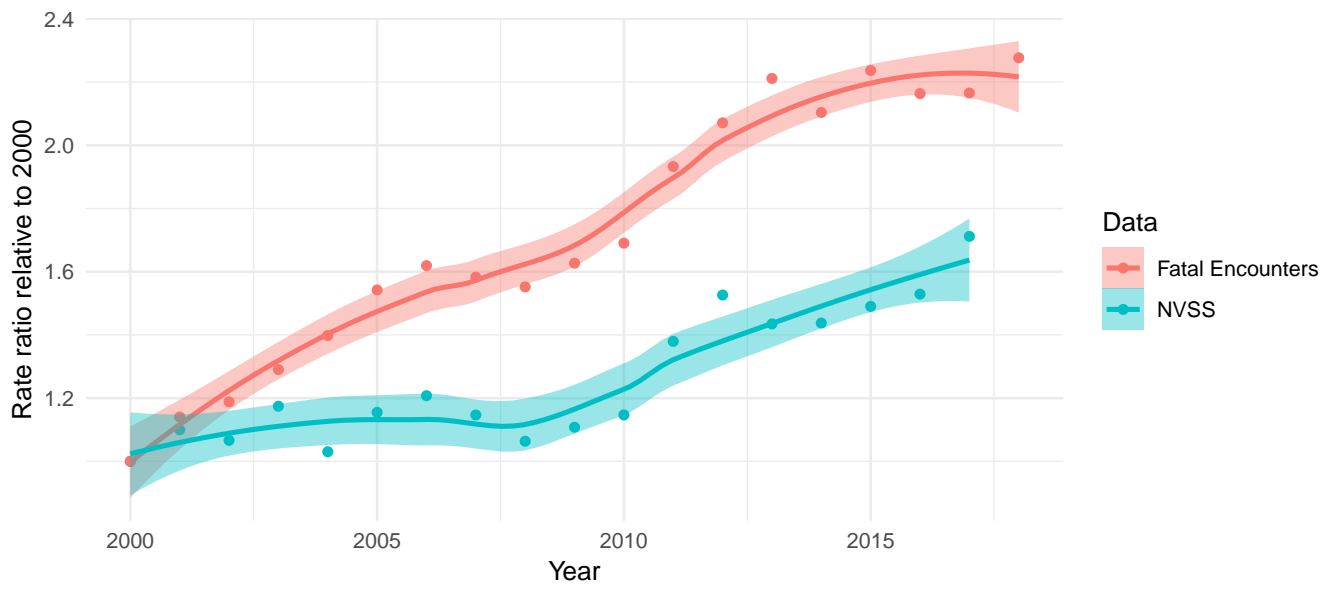

**Fig. S2.** Proportional change in reported deaths in NVSS and Fatal Encounters since 2000

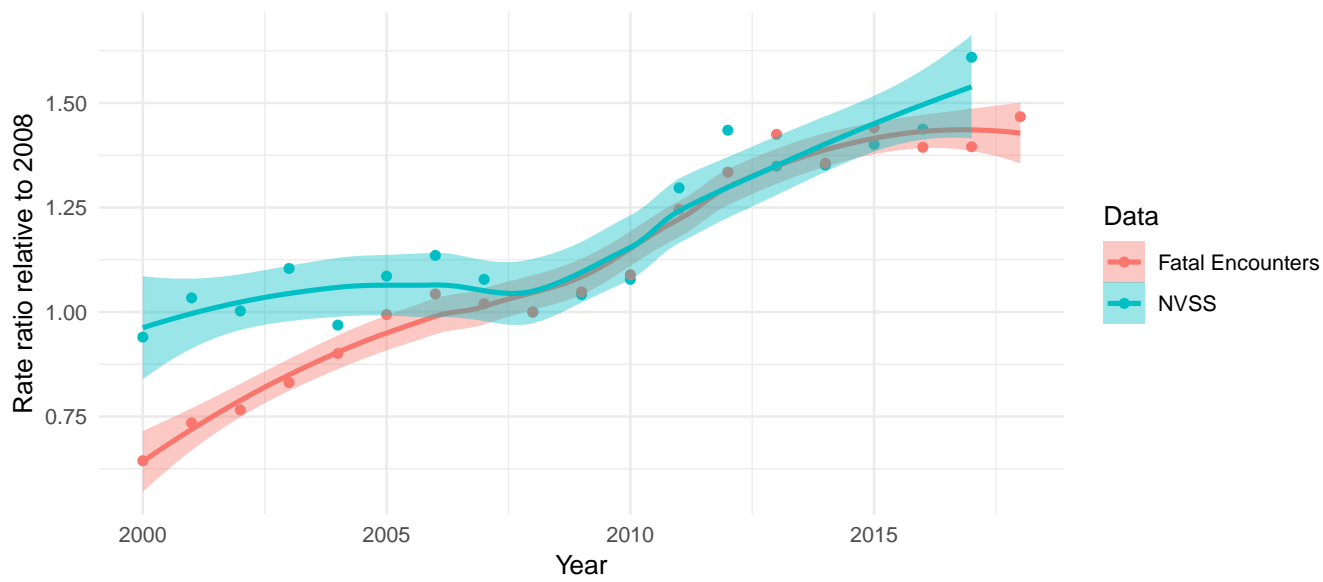

Fig. S3. Proportional change in reported deaths in NVSS and Fatal Encounters since 2008

69 Figure S3 rescales both time series to display proportional changes in case counts relative to the observed counts for 2008.  
70 This figure strongly suggests that the trends in NVSS and Fatal Encounters converge after 2008. It may be fruitful in future  
71 research to estimate the magnitude of undercoverage in FE using secondary data like NVSS. Based on this analysis, we assume  
72 that undercoverage in Fatal Encounters becomes less pronounced after 2007, and focus our analyses on cases after 2008. Because  
73 of the quality of race / ethnicity data in FE, we further restrict the time series to 2013 - 2018, discussed in more detail below.

## 74 Race/ethnicity data in Fatal Encounters

75 Fatal Encounters codes decedent race with the mutually exclusive values: African American / Black; Asian / Pacific Islander;  
76 European-American / White; Hispanic / Latino; Middle Eastern; Native American / Alaskan; and Race unspecified. Ethnicity  
77 is not coded separately from race, so no distinctions among ethnic groups (i.e. Black and non-Black Latinx people) are possible  
78 using these data. We preserve these categories in all analyses, with the exception of Middle Eastern, which we recode to  
79 "White" based on census racial classifications to match population data.

80 Fatal Encounters codes race/ethnicity opportunistically based on a series of potential data sources. When available, official  
81 records or news reports that explicitly identify a victim's race or ethnicity are used. However, such identifications are rare  
82 in news reports, which typically adhere to style guidelines limiting the use of racial or ethnic categories in their reporting.  
83 When explicit identifications are unavailable, Fatal Encounters researchers combine information and photos from original news  
84 reports, obituaries, or social media profiles to make qualitative assessments of a victim's race and ethnicity.

85 While researcher perceived race based on cues such as skin tone, name, and manner of dress is informative, it has distinct  
86 limits. Researcher perceived race may correlate with the perception of a victim's race held by the officer involved in the focal  
87 fatal encounter. Perceptions of an individual's racial or ethnic identity, rather than an individual's self-identification, may  
88 activate biases or scripts that structure the officer's interaction with the victim. However, the social and cultural background  
89 and information available to either the officer or researcher may differ in ways that lead to different appraisals of victim  
90 race/ethnicity. An individual's self-identified race/ethnicity may also differ in important ways from an officer or researcher's  
91 perception of their race/ethnicity. This is particularly relevant for multi-racial or multi-ethnic victims, for American Indian /  
92 Alaska Native victims, and for Latinx victims.

93 Like overall counts of cases in Fatal Encounters, earlier years recorded in the data are likely subject to diminished quality  
94 due to the gradual development of internet news coverage, the timing of the development of major social media platforms, and  
95 the development of online obituary services, all of which made photos of individuals more widely available. We show a time  
96 series of the proportion of cases missing race/ethnicity data in FE in Figure S4.

97 About 60 percent of use-of-force cases documented for 2000 are missing data on race/ethnicity. This proportion decreases  
98 steadily toward a minimum of about two percent of cases in 2015, followed by a gradual increase in recent years. Fatal  
99 Encounters researchers return to cases previously coded only based on news reports to conduct additional searches for obituaries  
100 published after the initial incident. In conversation with the authors, Fatal Encounters indicated that missing race/ethnicity  
101 data for 2018 and 2019 should be reduced once researchers conduct obituary searches for cases occurring in these years.

102 **Comparing Fatal Encounters to NVSS data on race/ethnicity.** To evaluate the validity of Fatal Encounters race / ethnicity data,  
103 we again turn to the NVSS. If we assume that each racial / ethnic group has a similar probability of being recorded as a "legal  
104 intervention" death, conditional on being killed by police, then the relative case composition of legal intervention deaths in  
105 NVSS can be used to detect systematic bias in Fatal Encounters' race/ethnicity data. Research suggests that race is not likely  
106 affecting the probability of cases being recorded as legal intervention deaths in NVSS (2). Below, we present the composition  
107 of Fatal Encounters cases prior to any missing data imputation procedures to ensure direct comparisons between the data  
108 recorded in each source.

109 Figure S5 shows the case composition by race/ethnicity excluding cases missing race/ethnicity data from the total case  
110 count in the proportion denominator. Note that there are no "legal intervention" cases missing race/ethnicity data in the  
111 NVSS. Both Fatal Encounters and NVSS record similar proportions of Asian / Pacific Islander victims. Until 2010, FE and  
112 NVSS record similar shares of American Indian victims, but NVSS records a greater share of American Indian / Alaska Native  
113 cases than does FE after 2010. Latinx victims made up a greater share of Fatal Encounters cases prior to 2008, but Latinx  
114 compositions appear similar across the datasets between 2008 and 2017. African Americans make up a consistently larger share  
115 of the case composition in Fatal Encounters than in NVSS. Among non-missing cases, Black victims composed between 40 and  
116 28 percent of the caseload between 2000 and 2018. White victims ranged between 30 and 50 percent of the cases in Fatal  
117 Encounters, while NVSS consistently reports a white case composition of between 45 and 60 percent. The difference in case  
118 compositions between FE and NVSS for both white and Black victims diminishes between 2010 and 2017.

119 Fatal Encounters researchers note that they have most confidence in their race/ethnicity data for data years after 2013.  
120 Between 2013 and 2017 (the latest available NVSS data), Fatal Encounters' African American case composition was between 8  
121 and 28 percent higher than NVSS, the American Indian / Alaska Native case composition was between 6 and 44 percent lower  
122 than NVSS, the Asian Pacific Islander case composition was between 12 and 46 percent lower than NVSS, the Latinx caseload  
123 was between 5 percent lower and 12 percent higher than NVSS, and the white case composition was between 1 and 9 percent  
124 lower than NVSS.

125 It is important to note that FE records as many or more deaths than NVSS for nearly all racial / ethnic groups during this  
126 time period. Between 2013 and 2017, FE records 2549 more cases than does NVSS (excluding 364 cases missing race ethnicity  
127 data). Between 2008 and 2012, FE records more cases than does NVSS for all groups other than American Indian / Alaska

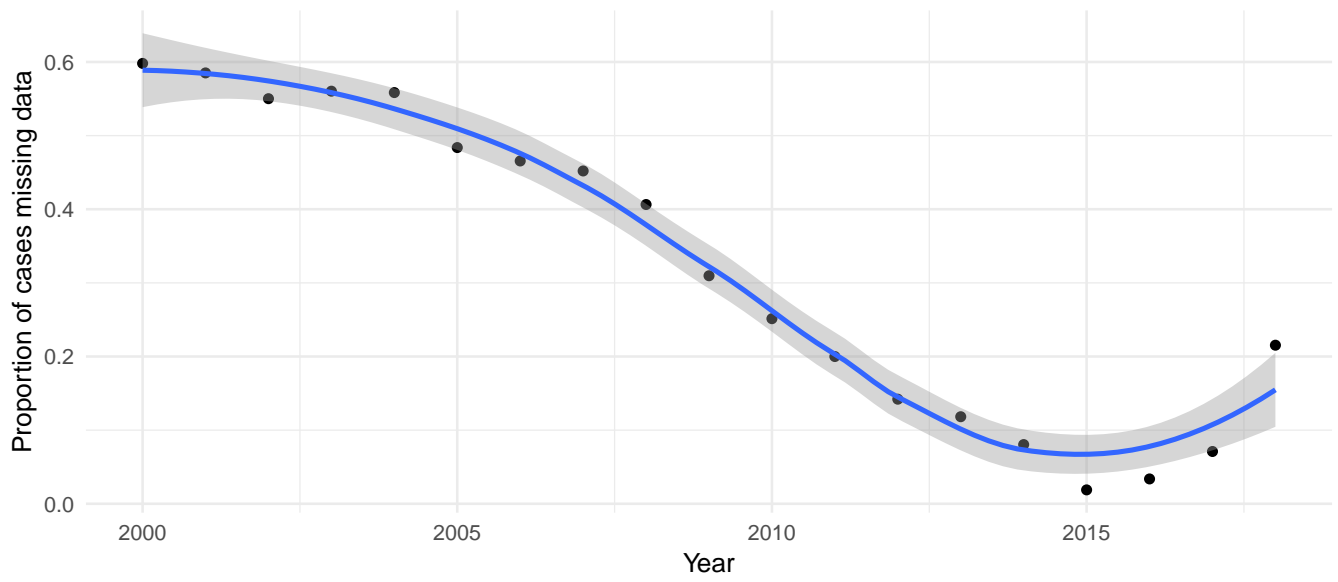

**Fig. S4.** Proportion of use-of-force cases missing data on race/ethnicity in Fatal Encounters, 2000 - 2018

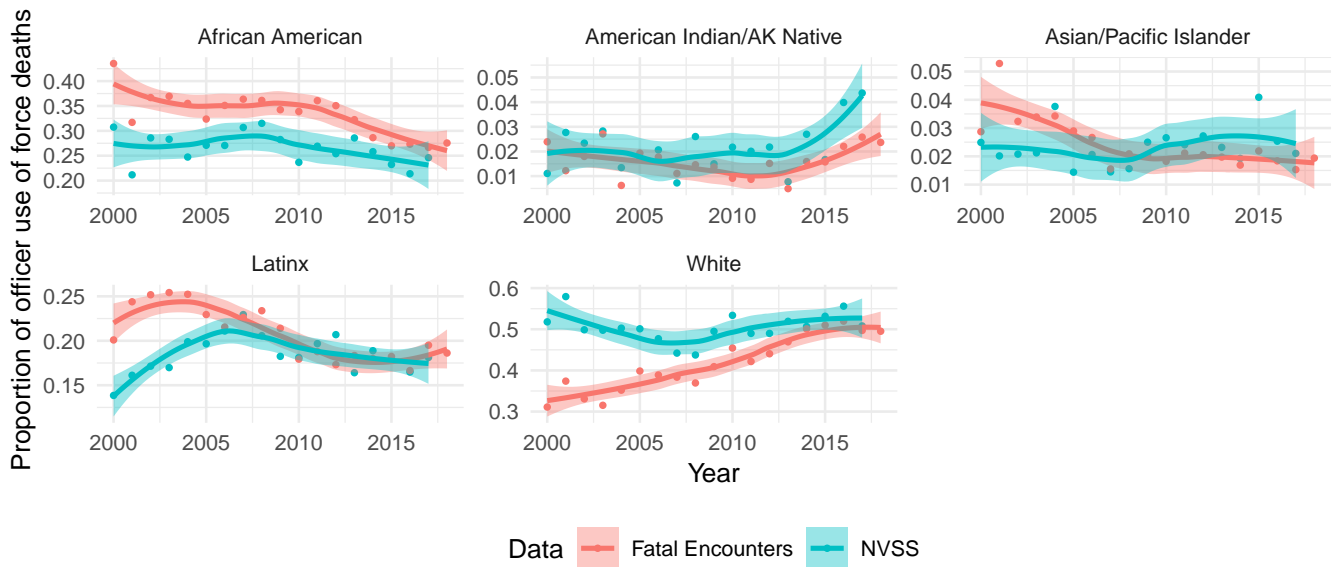

Fig. S5. Proportion of cases in NVSS and Fatal Encounters by race, excluding cases missing race/ethnicity data, 2000 - 2018. Note that y-axis scales vary for each plot



128 Natives. In 2008, 2010, and 2011, FE records 3 fewer American Indian / Alaska Native deaths than does NVSS. In 2009 and  
129 2012, FE records 2 more deaths than does NVSS.

130 This comparison shows that FE racial/ethnic case compositions have some divergence from NVSS case compositions, and  
131 that these differences are most pronounced for African Americans, American Indians, and Asian / Pacific Islanders. Despite  
132 these divergences, FE is generally recording dramatically more cases for each subgroup than is NVSS. Relative to NVSS,  
133 observed counts in Fatal Encounters are not negatively biased for any subgroup, with the potential exception of American  
134 Indian / Alaska Natives in years prior to 2012. Mortality rate ratios based solely on the observed data may be biased when  
135 relying on FE data if NVSS race data is unbiased. Future researchers may consider conducting a systematic audit of FE  
136 race/ethnicity coding to evaluate the interrater reliability of FE coding decisions for race / ethnicity.

### 137 Multiple imputation of missing data in Fatal Encounters

138 Table S1 shows the percent of cases missing data on each variable in Fatal Encounters between 2013 and 2018 for all causes of  
139 death, including suicides and non-use-of-force related deaths. Because we have reason to believe that case counts are censored in  
140 earlier years of the data and because FE reports low confidence in race / ethnicity data prior to 2012, we exclude observations  
141 from 2000 to 2012 in imputation models. About 1.8 percent of cases are missing data on victim age, about 0.1 percent are  
142 missing data on victim sex, and about 9 percent are missing data on victim race.

143 Our approach to missing data seeks to accurately describe uncertainty in mortality estimates by directly accounting for  
144 error driven by missing data, as well as providing rate estimates that are not negatively biased through the list-wise deletion of  
145 cases missing data on particular variables.

| Year | Sex    | Race | Age   |
|------|--------|------|-------|
| 2013 | 0      | 11.8 | 1.04  |
| 2014 | 0      | 8.04 | 0.731 |
| 2015 | 0      | 1.89 | 0.516 |
| 2016 | 0.178  | 3.38 | 1.87  |
| 2017 | 0.0888 | 7.10 | 2.31  |
| 2018 | 0.169  | 21.5 | 4.90  |

Table S1. Focal variables missing values in Fatal Encounters by year, percent of cases 2013 - 2018

146 To address missing data, we draw multiple imputations of missing values based on models including information on the year  
147 of death, victim age, victim sex, victim race, the cause of death, the racial composition of the county in which the victim was  
148 killed, and the probability of a victim's race/ethnicity conditional on victim surname compiled from Census surname lists by  
149 Imai and Khana (5). Sensitivity analyses exploring the predictive validity of county, tract and block-group-level demographics  
150 suggested that county-level demographics maximized model classification validity. This is perhaps due to the fact that geodata  
151 recorded in Fatal Encounters records the location of death, and many victims recorded in Fatal Encounters did not die at home.

152 Multiple imputation enables us to model uncertainty in the composition of cases in Fatal Encounters driven by missing data  
153 through the construction of uncertainty intervals derived from samples from our missing data models. These count estimates  
154 are by definition equal to or greater than those directly estimated from the observed data. However, by making the assumption  
155 that values are missing at random conditional on model predictors, we are able to provide additional precision in estimating  
156 the range within which actual mortality risk likely lies for each subgroup. We show the impacts of imputation on mortality  
157 risk estimates in Figure S6. For all groups, risk estimates based solely on imputed and observed data (not model predictions)  
158 yield estimates greater than or equal to values based on estimates from the observed data in which cases missing values are  
159 deleted. Lower bounds on our estimates after imputation are generally close to these list-wise deletion estimates. However, our  
160 imputation procedure enables a more realistic examination of uncertainty in risk by incorporating missing data as a source of  
161 measurement error.

162 Model predictions are generated using multiple imputation through chained equations (6). We construct 10 imputed datasets  
163 to ensure adequate coverage of uncertainty intervals for the race variable, which has a high number of missing cases in late  
164 years of the data.

165 Figure S8 shows the estimated mean and standard deviation of each imputed dataset (color) by variable across iterations,  
166 using an MCMC based approach to imputing predicted values in resulting datasets. The traceplots indicate model convergence,  
167 and appear free of any trends.

168 We show the distribution of the imputed race/ethnicity variable relative to the observed data in Figure S7. The solid points  
169 in this figure represent the observed proportion of cases in each group, and the bars represent the range of the imputed values.  
170 For American Indian, Asian, and Black people, the proportion of the observed FE data in each group is within the range of the  
171 imputed values. The distribution of the imputed data do not greatly differ than the distribution of the observed data for these  
172 groups. There is a greater share of Latinx victims in the observed data than there are in the imputed data, and there is a  
173 greater share of white victims in the imputed data than there are in the observed data.

174 In the observed data (excluding missing cases), Latinx victims make up about 18 percent of the recorded cases. Our  
175 imputations suggest that they make up between 16.7 and 16.9 percent of all cases. White victims make up about 48 percent of  
176 the recorded cases in the observed data. Our imputations suggest they make up between 49.5 and 50.1 percent of all cases.

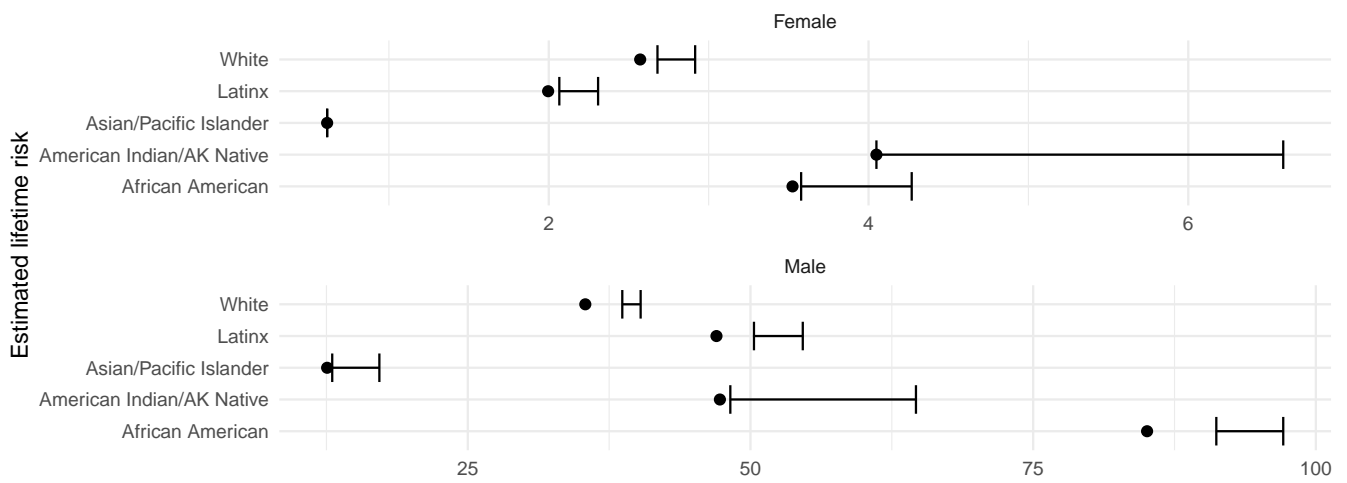

**Fig. S6.** Sensitivity of risk estimates to missing data. Points indicate cumulative risk from Fatal Encounters 2013-2018 use of force deaths, excluding cases missing race/ethnicity data. Error bars indicate full interval of risk estimates using imputed values (not model simulations)

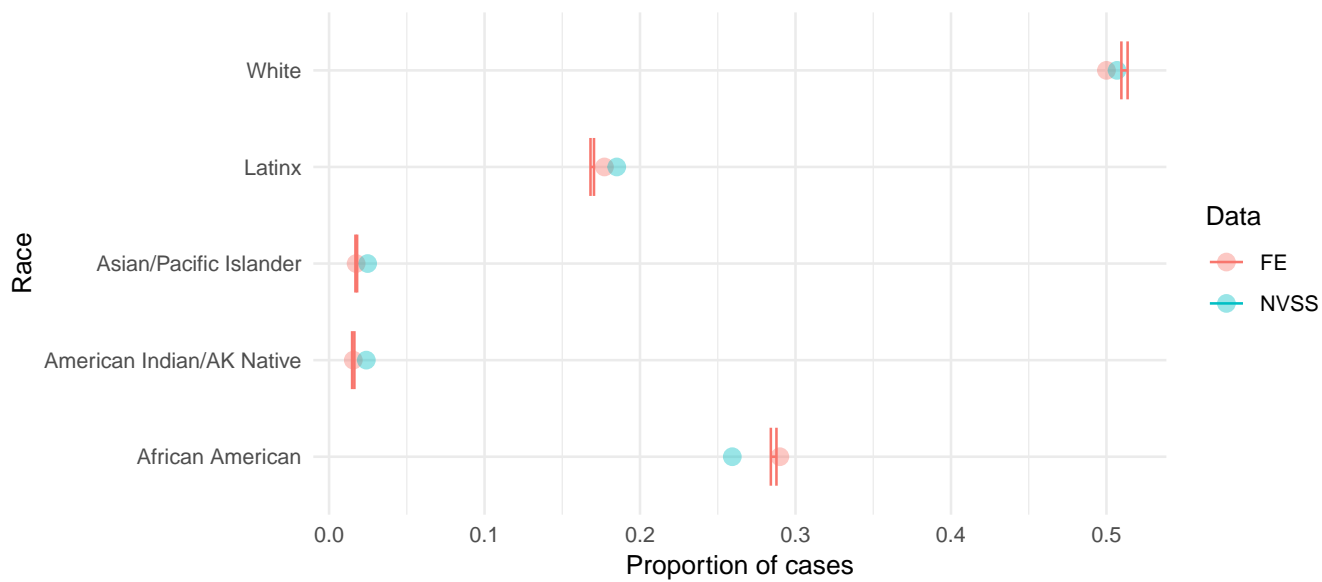

Fig. S7. Proportion of cases in observed Fatal Encounters and NVSS data (point) and range of imputed data (bar), 2013 - 2018

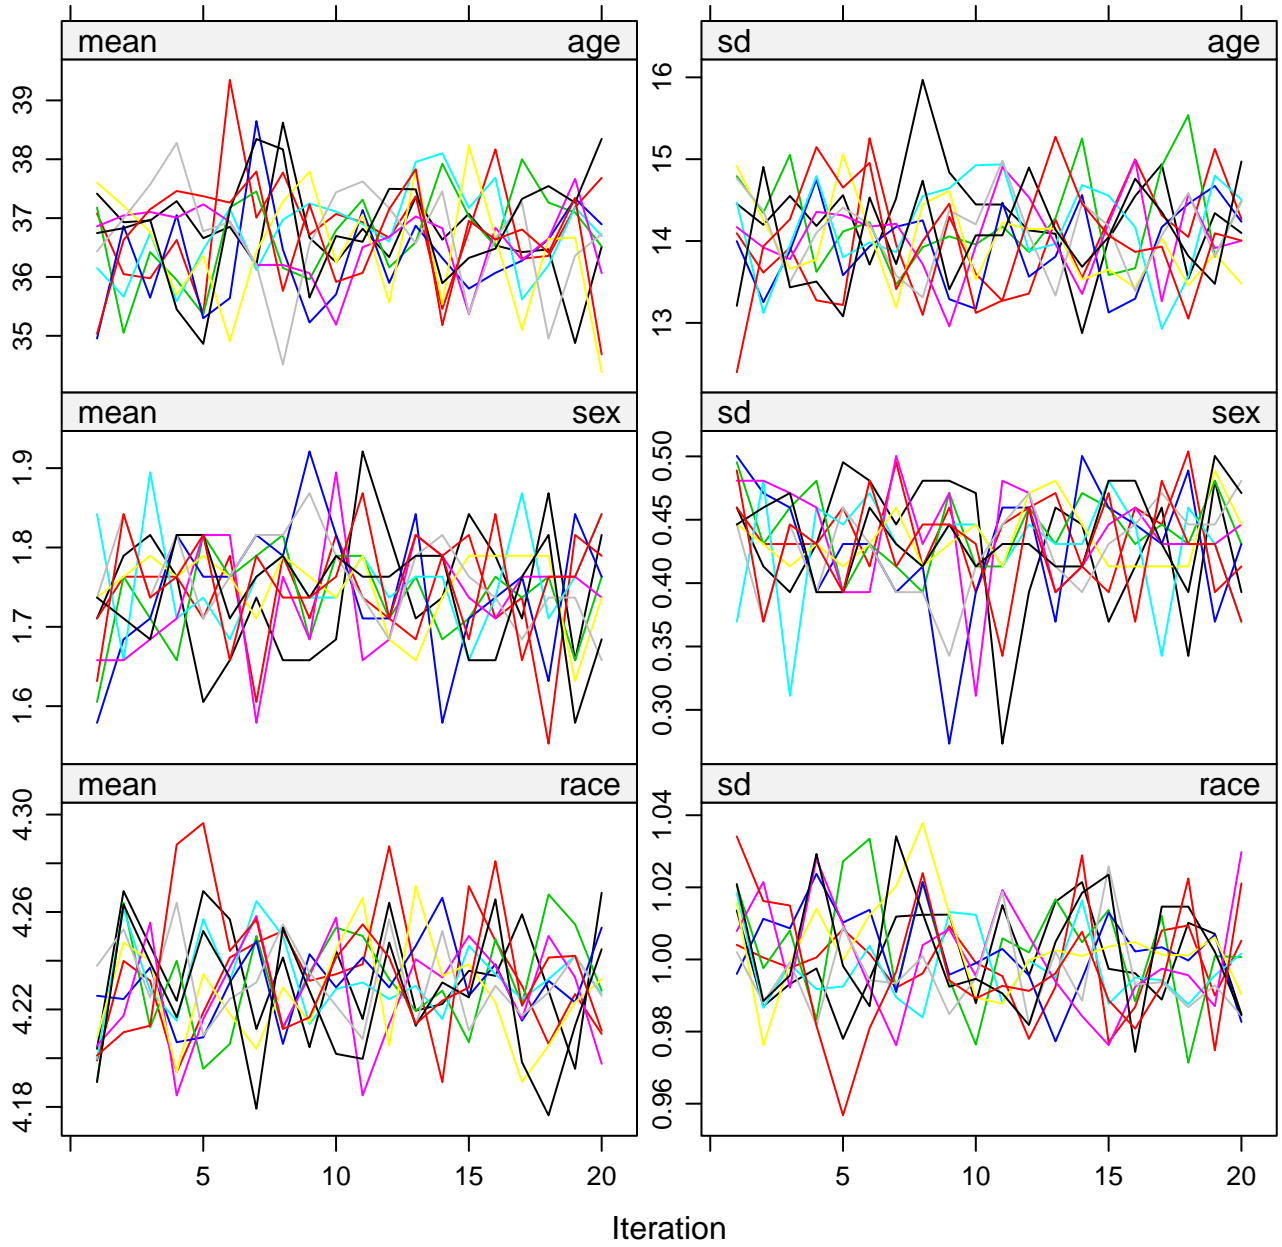

Fig. S8. Traceplot of mean and standard deviation of imputed variables

177 This gap between imputed and observed proportions in Fatal Encounters is a function of the relationship between the  
 178 probability of missingness and a victim’s race/ethnicity. Our imputation models address this dependence by including two  
 179 direct predictors of victim race/ethnicity; victim surname and racial/ethnic population composition in the county of death.

180 To evaluate whether these predictors are correlated with missingness, we model the probability that a case is missing  
 181 race/ethnicity data with a logistic regression. Selected parameter estimates from this model are displayed in Table S2.

| Term                              | Estimate | SE   |
|-----------------------------------|----------|------|
| County proportion American Indian | 0.20     | 0.45 |
| County proportion Asian           | -0.24    | 0.34 |
| County proportion Black           | -0.04    | 0.16 |
| County proportion Hispanic        | -0.96    | 0.16 |
| Pr(White Surname)                 | -1.06    | 0.54 |
| Pr(Black Surname)                 | -0.97    | 0.57 |
| Pr(Hispanic Surname)              | -1.16    | 0.54 |
| Pr(Asian Surname)                 | -0.85    | 0.59 |

**Table S2. Relationships between county racial demographics, surnames and likelihood of missing race/ethnicity data in Fatal Encounters 2000 - 2018. Logistic regression with year intercepts, age slope, sex intercept, and cause of death intercept estimated but not displayed.**

182 Cases are less likely to be missing data when they are in counties with large Hispanic populations than when they occur  
 183 in counties with smaller Hispanic populations. A surname with a high conditional probability of being Hispanic based on  
 184 census records is also associated with a a lower probability of being missing. These relationships suggest that names and  
 185 locations of death are associated with a higher likelihood of positive ethnic identification in Fatal Encounters, either through  
 186 identifying features in initial reports, or through coder inference based on surname or other contextual information. Because  
 187 Latinx victims are less likely to be missing in the observed data, their share of total reports in imputed data is somewhat lower.

## 188 Models of temporal variation in group-specific risk

189 To systematically combine multiple years of FE data, we build Bayesian negative binomial regression models of police-involved  
 190 deaths with year, race, sex and age as predictors. We use these models to predict group-specific risks of being killed by police  
 191 for a year *unobserved* in the data. Our prediction for a new year represents our best estimate of underlying police-homicide risk  
 192 for each demographic group, synthesized from the available data. This approach incorporates temporal variation in risk across  
 193 the 2013 - 2018 period as a source of uncertainty in our risk estimates.

194 We assume – and confirm, later, via model comparison tests – that police-homicide risk varies jointly by age, sex and race.  
 195 To appropriately incorporate time, which has a more ambiguous functional relationship with homicide risk, into our models, we  
 196 first examine how police-homicides vary across years in the observed data.

197 Figure S9 displays the count of police-involved deaths for each sex and race group as a function of time. For most groups,  
 198 the observed count of police involved deaths stays stable from 2013-2018. Mortality counts vary most notably among Latinas,  
 199 with counts falling to lows in 2015 and 2016.

200 Next, Figures S10 and S11 display the observed relationship among age, race, sex and count of police-homicides within each  
 201 year of the data. Among males, the age-specific risk of being killed by police is stable across years for all racial groups. Small,  
 202 year based shifts in total deaths are apparent. For Black males, for example, the count of mortalities in 2013 is slightly higher  
 203 the count of mortalities in 2017, but the age at which Black men are at most risk of being killed by police appears consistent  
 204 across time. Patterns among females are somewhat more variable across years. However, the small counts among these groups  
 205 makes it difficult to determine whether this variation is simply due to noise.

206 Taken together, the observed data suggests that a model allowing intercepts to vary by year could help improve predictions.  
 207 The observed data also suggest that age, race and sex effects are largely independent of year. While the total count of deaths  
 208 vary among years, the age, race, and sex patterns observed within each group remains relatively stable across time.

209 To further interrogate this assumption about age-effect stability across time, particularly among females, we build stratified  
 210 regression models that allow for age effects to vary across years. Specially, for each race by gender subset of the data we fit: 1)  
 211 a model that treats age and year as independent parameters and 2) a model that allows for age slopes to vary across years.

212 Results from our stratified models largely confirm the patterns observed in the data. Among males, models that include and  
 213 exclude a year by age interaction are indistinguishable, both in terms of out of sample accuracy and predicted values. Models  
 214 for females yielded similar conclusions. Additional tests, which treat year and age as interval measures, modeled via splines,  
 215 align with these conclusions.

**Simulation models.** With a better understanding of how time factors into our mortality estimates, we move to build the models  
 that underlie our life-table estimates. We fit and compare four specifications of how race, sex, age and year might predict risk

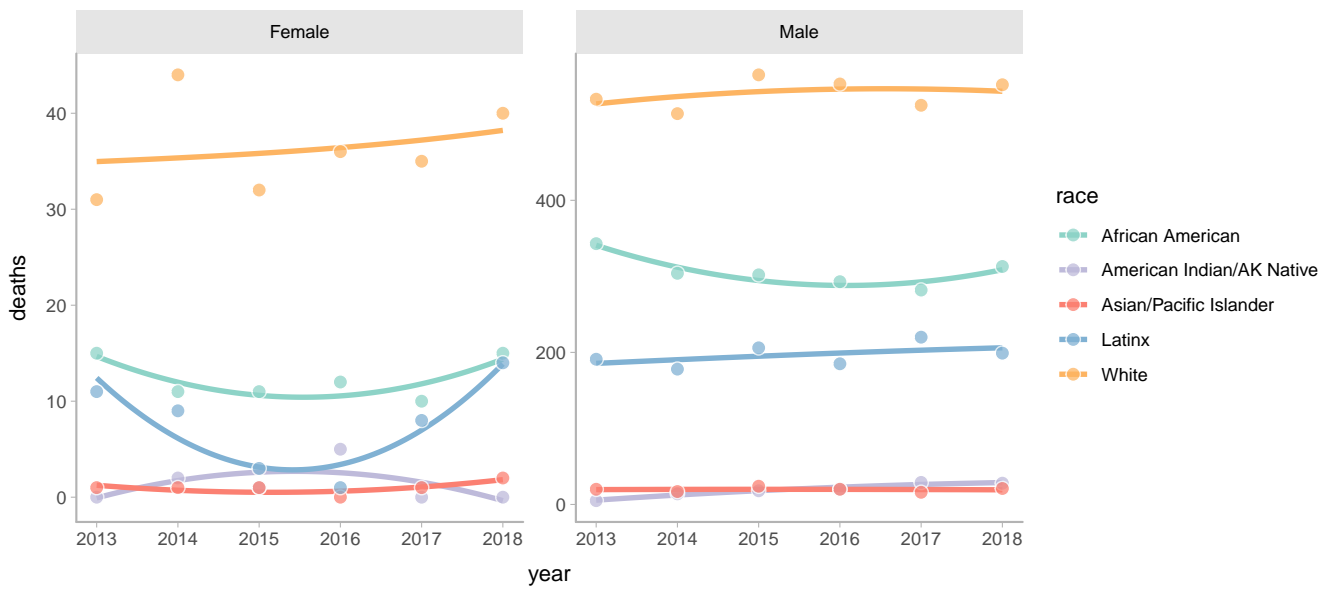

Fig. S9. Observed count of police-involved deaths by race and sex, 2013-2018 with loess smooth

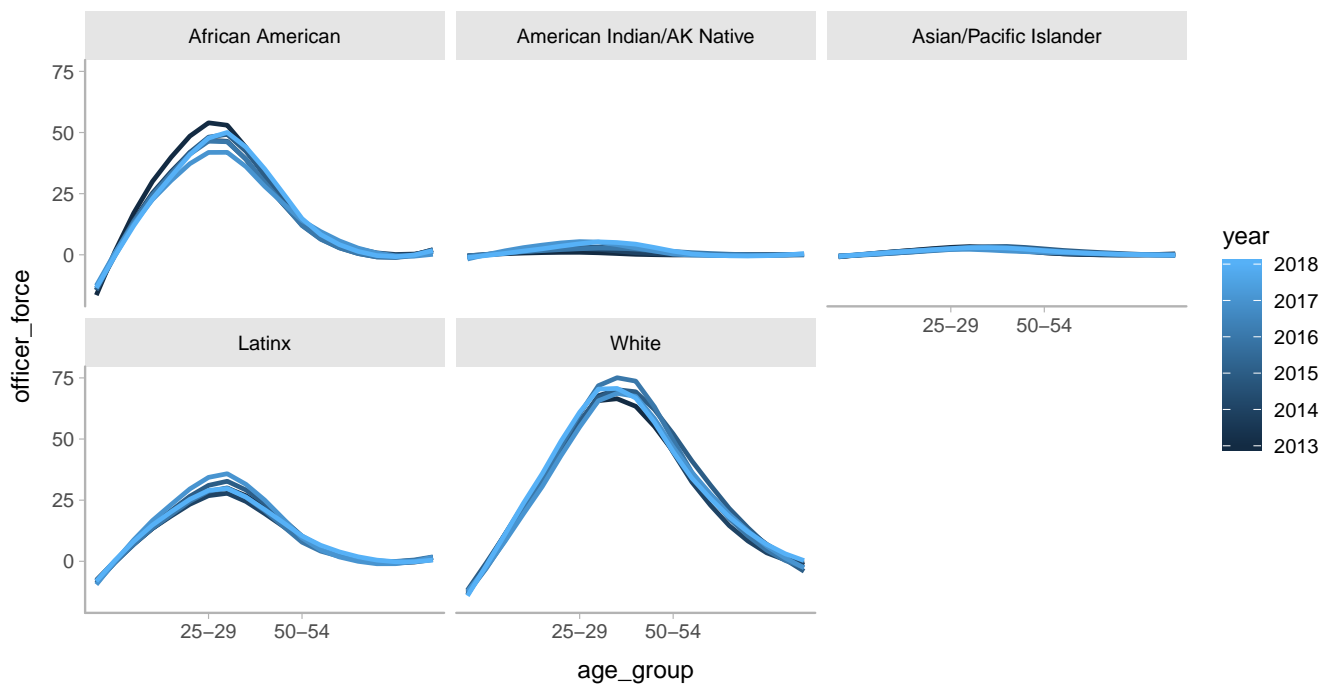

**Fig. S10.** Males: Observed count of police-involved deaths by age, race, sex, and year with loess smooth

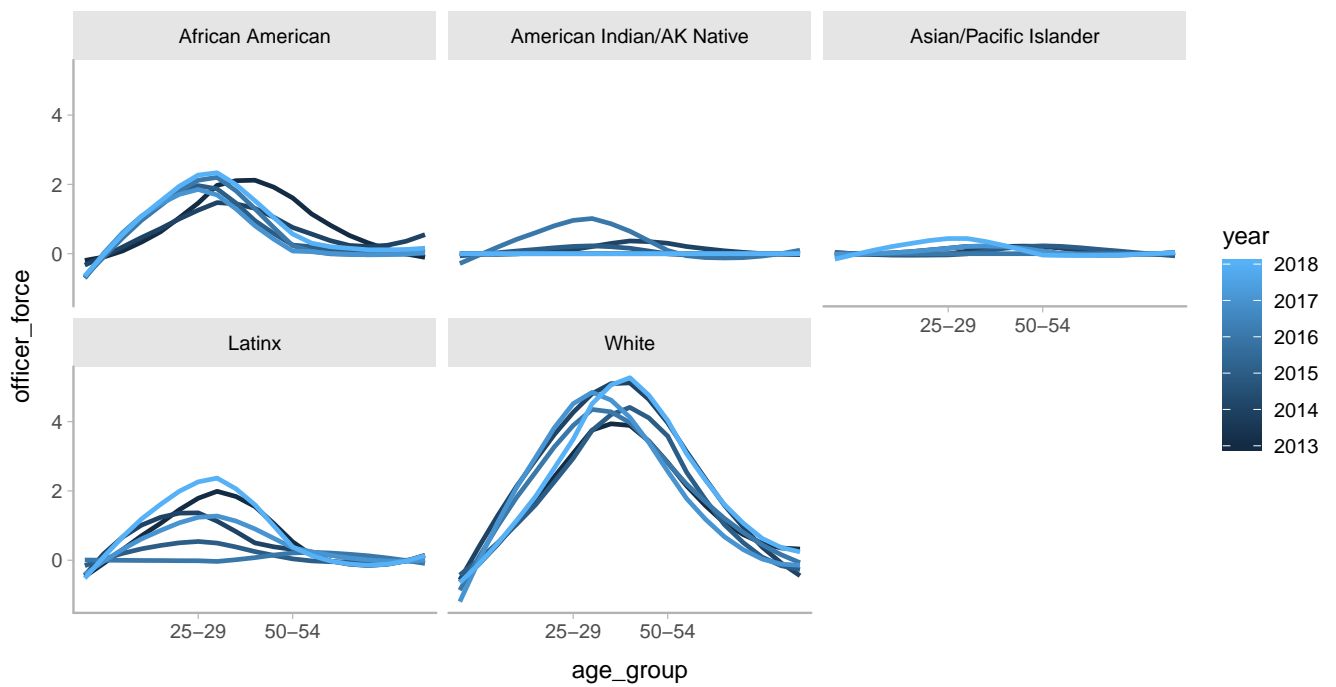

**Fig. S11.** Females: Observed count of police-involved deaths, by age, race, sex, and year. Note: curves are produced via a loess smooth of the observed data.



of police-involved mortality. These specification are as follows:

$$M_0: \text{death count} = f(\text{race} + \text{sex} + \text{age} + \text{year})$$

$$M_1: \text{death count} = f([\text{race} * \text{sex}] + \text{age} + \text{year})$$

$$M_2: \text{death count} = f([\text{race} * \text{sex} * \text{age}] + \text{year})$$

$$M_3: \text{death count} = f(\text{age} + [\text{race} * \text{sex} * \text{year}])$$

Model 0 ( $M_0$ ) assumes that race, sex, age and time have independent effects on mortality risk. Model 1 ( $M_1$ ) allows for race and sex to jointly predict mortality, Model 2 ( $M_2$ ) allows for race and sex effects to vary by age, and Model 3 ( $M_3$ ) allows for race and gender effects to vary by year. All models are multilevel, with race and sex fixed-effects and age-group and year-specific random intercepts specified throughout. Log population size is used as an offset in each model.

To determine which model best describes the data, we use leave-one-out-cross-validation information criterion (LOO-IC) estimates (7). LOO-IC estimates are calculated from approximate leave one out cross-validation tests and broadly summarize a model's accuracy in predicting new data relative to other model specifications. Like other information criterion measures, lower LOO-IC values indicate better fitting models.

| model | LOO-IC |
|-------|--------|
| $M_0$ | 2724.8 |
| $M_1$ | 2715.4 |
| $M_2$ | 2638.6 |
| $M_3$ | 2715.5 |

Among the model specifications tested, M2 appears to fit the data the best. As such, we simulate from M2. We estimate this model over each imputed dataset, then pool posterior predictions from each model for 4000 hypothetical death counts with each subpopulation held constant at 100,000,000 persons. This method ensures that we generate stable mortality estimates with reasonable uncertainty intervals, even for sub-groups with few observed events or small populations over the period in which Fatal Encounters data is valid.

### Life table methods

All estimates mortality risk and rate estimates in the paper are calculated from multiple decrement period life tables (8). These tables take two inputs: 1) counts of age-race-sex specific deaths from the US population in 2017 derived from the NVSS public mortality files and 2) age-race-sex specific predictions of police use-of-force deaths simulated from the regression models described above.

This method creates a synthetic cohort of 100,000 individuals for each race-sex group, then evaluates how mortality risk would affect the risk of death over the life course if the age-race-sex specific death rates observed in the 2013 - 2018 Fatal Encounters data and overall mortality rates observed in the 2017 NVSS remained constant.

| Age | Race  | Sex  | Total deaths | Use-of-force deaths | Survivors in cohort |
|-----|-------|------|--------------|---------------------|---------------------|
| 0   | White | Male | 496.29       | 0.01                | 100000.00           |
| 1   | White | Male | 104.04       | 0.01                | 99503.71            |
| 5   | White | Male | 56.81        | 0.06                | 99399.67            |
| 10  | White | Male | 87.17        | 0.04                | 99342.86            |
| 15  | White | Male | 319.95       | 1.30                | 99255.69            |
| 20  | White | Male | 637.08       | 3.18                | 98935.74            |
| 25  | White | Male | 894.65       | 5.62                | 98298.66            |
| 30  | White | Male | 1039.69      | 6.13                | 97404.00            |
| 35  | White | Male | 1204.78      | 5.60                | 96364.32            |
| 40  | White | Male | 1297.84      | 4.54                | 95159.54            |
| 45  | White | Male | 1837.68      | 3.83                | 93861.70            |
| 50  | White | Male | 2607.33      | 2.99                | 92024.02            |
| 55  | White | Male | 4016.77      | 2.32                | 89416.69            |
| 60  | White | Male | 5591.27      | 1.24                | 85399.91            |
| 65  | White | Male | 7084.67      | 0.92                | 79808.64            |
| 70  | White | Male | 10181.83     | 0.62                | 72723.97            |
| 75  | White | Male | 12885.66     | 0.30                | 62542.14            |
| 80  | White | Male | 15237.63     | 0.20                | 49656.48            |
| 85  | White | Male | 34418.85     | 0.17                | 34418.85            |

Table S3. Excerpt of police use-of-force multiple decrement period lifetable, synthetic cohort of 100,000

Table S3 shows an excerpt of the full life tables we use in the main analysis. It includes a subset of columns in our calculation of white male police use-of-force mortality risk. Using NVSS 2017 total mortality rates, we separately estimate a single decrement period life-table to obtain age-specific mortality rates and estimate overall cohort mortality. Using this period life

241 table, we estimate both age-specific and cumulative rates of police use-of-force deaths, after adjusting for both cross and within  
242 age-period mortality by age group.

243 We estimate three sets of tables using our model predictions. One at the 5th percentile of the distribution of posterior  
244 predictions, one at the median of posterior predictions, and one at the 95th percentile of the distribution of our posterior  
245 predictions. All uncertainty intervals reported in the paper reflect these 90 percent uncertainty intervals.

## 246 Inclusion criteria and mortality estimates

247 We emphasize deaths caused by police use-of-force to ensure we capture only those cases in which police action is the direct  
248 cause of death. FE includes a broad number of causes of death. After auditing cause-of-death codes to determine which  
249 indicated police use-of-force as a proximate cause, we include cases in which the cause of death was coded as: asphyxiated /  
250 restrained; beaten / bludgeoned with instrument; chemical agent / pepper spray; gunshot; medical emergency; and tasered.  
251 Gunshots account for 91 percent of these cases.

252 All suicides and other causes of death are excluded from our main analysis. In addition to suicides, these causes include:  
253 burned / smoke inhalation; drowned; drug overdose; fell from a height; other; stabbed; undetermined; and vehicle. Vehicle  
254 deaths account for nearly all of the non-suicide excluded deaths. Use-of-force deaths account for about two-thirds of all deaths  
255 reported in FE.

256 We explore the effect that our inclusion criteria have on cumulative mortality estimates by separately estimating lifetime  
257 mortality risk for 4 classes of causes of death. Unlike the main analysis, these results are computed from a single imputation  
258 of the data, not model-based predictions, and are provided for comparison purposes only as they lack uncertainty estimates.  
259 Figure S12 shows our estimate of lifetime mortality risk at 2013 - 2018 rates for four nested categories. Use of force deaths; use  
260 of force plus vehicle deaths; use of force, vehicle, and suicide deaths; and all reported deaths in FE.

261 The greatest impact on mortality estimates is for women. The inclusion of vehicle fatalities more than doubles our estimates  
262 of lifetime risk for all racial and ethnic groups. For Black women, our estimates of lifetime risk jump from about 4 in 100,000  
263 when considering only use-of-force deaths to about 12 per 100,000 when including deaths involving motor vehicles. Future  
264 research should closely consider how police chases contribute to mortality risk. The inclusion of suicides and other causes of  
265 death have much less pronounced effects on our risk estimates.

## 266 References

- 267 1. Banks D, Ruddle P, Kennedy E, Planty MG (2016) *Arrest-related deaths program redesign study, 2015-16: Preliminary*  
268 *findings*. (Department of Justice, Office of Justice Programs, Bureau of Justice Statistics, Washington, DC).
- 269 2. Feldman JM, Gruskin S, Coull BA, Krieger N (2017) Quantifying underreporting of law-enforcement-related deaths in united  
270 states vital statistics and news-media-based data sources: A capture - recapture analysis. *PLOS Medicine* 14(10):e1002399.
- 271 3. Conner A, Azrael D, Lyons VH, Barber C, Miller M (2019) Validating the national violent death reporting system as a  
272 source of data on fatal shootings of civilians by law enforcement officers. *American journal of public health* 109(4):578–584.
- 273 4. Krieger N, Chen JT, Waterman PD, Kiang MV, Feldman J (2015) Police killings and police deaths are public health data  
274 and can be counted. *PLOS Medicine* 12(12):e1001915.
- 275 5. Imai K, Khanna K (2016) Improving ecological inference by predicting individual ethnicity from voter registration records.  
276 *Political Analysis* 24(2):263–272.
- 277 6. Buuren Sv, Groothuis-Oudshoorn K (2010) mice: Multivariate imputation by chained equations in r. *Journal of statistical*  
278 *software* pp. 1–68.
- 279 7. Vehtari A, Mononen T, Tolvanen V, Sivula T, Winther O (2016) Bayesian leave-one-out cross-validation approximations  
280 for gaussian latent variable models. *The Journal of Machine Learning Research* 17(1):3581–3618.
- 281 8. Preston S, Heuveline P, Guillot M (2000) *Demography: Measuring and Modeling Population Processes*. (Wiley-Blackwell,  
282 Malden, MA).

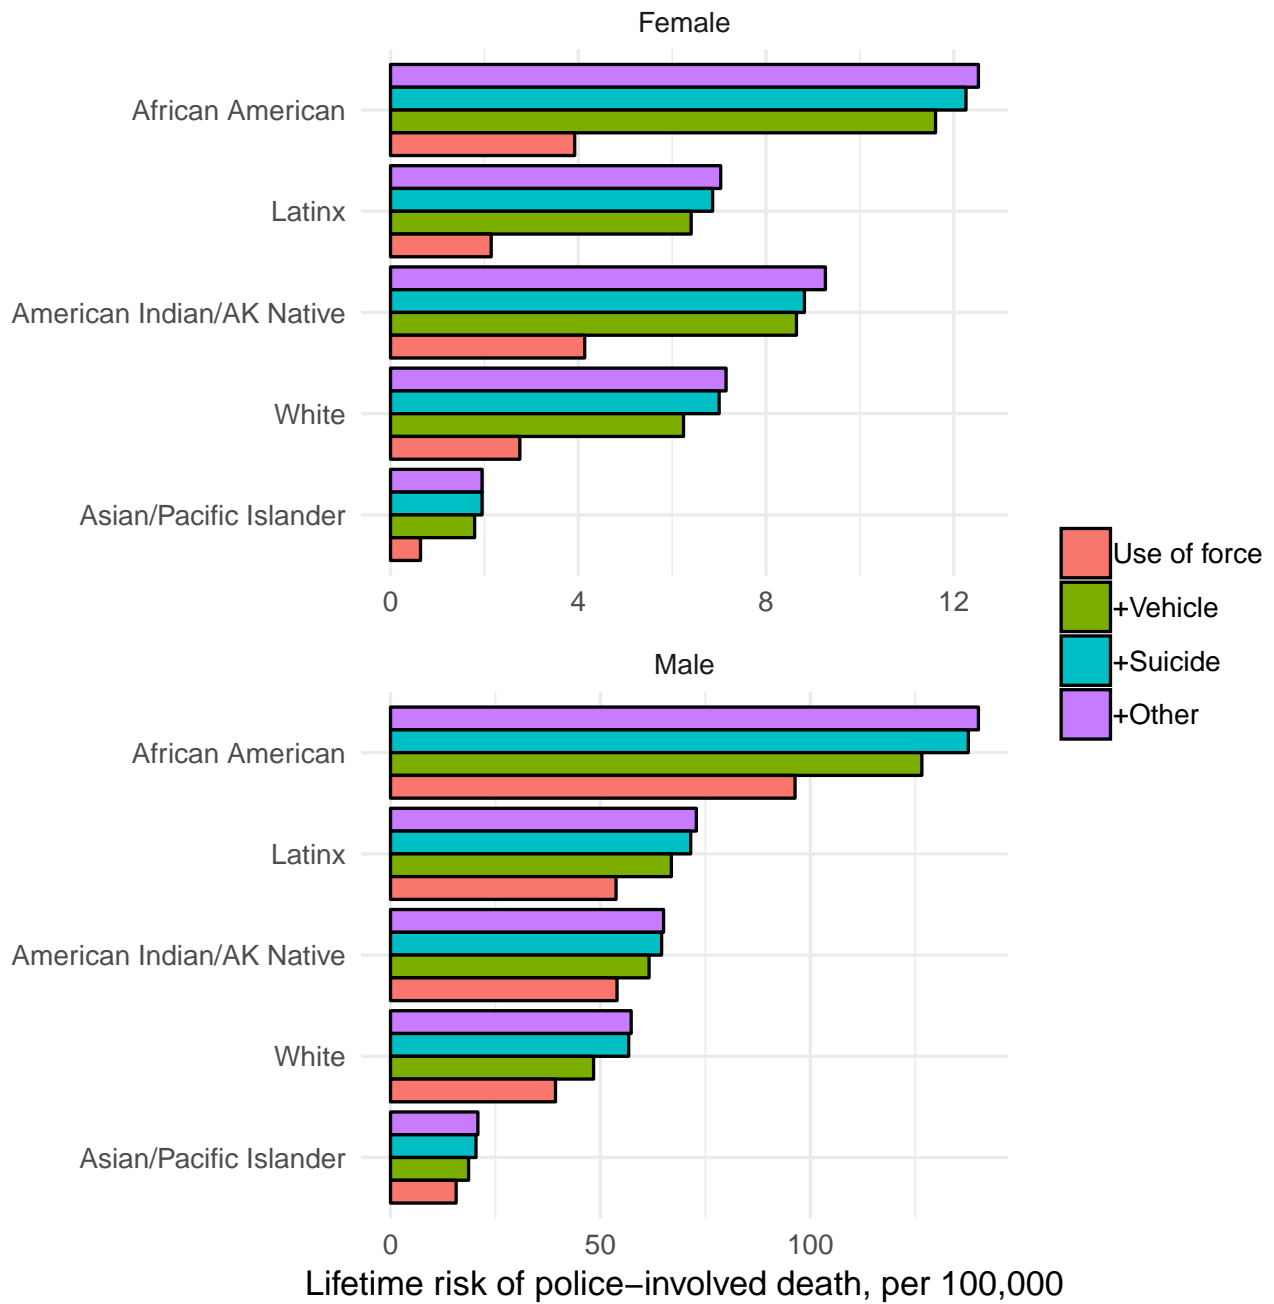

Fig. S12. Cumulative risk of dying during interactions with law enforcement by race, sex, and cause of death
